# Supplementary material for: Recombinant Zoster Vaccine Is Efficacious and Safe in Frail Individuals
Source: PubMed Central journal article supplement — J Am Geriatr Soc. 2020 Nov 16;69(3):744–52. doi: 10.1111/jgs.16917 (PMC7984267; doi:10.1111/jgs.16917), 2020-11-16
Supplement: JGS-69-744-s001.pdf [file JGS-69-744-s001.pdf]

## Supplemental material

Desmond Curran, Joon Hyung Kim, Sean Matthews, Christophe Dessart, Myron J. Levin, Lidia Oostvogels, Megan E. Riley, Kenneth E. Schmader, Anthony L. Cunningham, Shelly A. McNeil, Anne E. Schuind, Melissa K. Andrew, on behalf of the Zoster-064 Study Group. *Recombinant Zoster Vaccine is Efficacious and Safe in Frail Individuals*. Journal of the American Geriatrics Society.

Supplemental File S1 - Frailty Assessment

Supplementary Table S1 - Details of components of frailty index

Supplementary Table S2 - Detail of medical history search items

Supplementary Table S3 - Vaccine efficacy estimates (modified total vaccinated cohort)

Supplementary Table S4 - Number of participants in the various cohorts (total vaccinated cohort)

Supplementary Table S5 - Summary of demographic characteristics

Supplementary Table S6 - Incidence and nature of symptoms (solicited only) reported during the 7-day (days 0–6) post-vaccination period overall per participant by frailty status (total vaccinated cohort - diary card subset)

Supplementary Figure S1 - Percentages of participants reporting any unsolicited adverse events within the 30-day (days 0-29) post-vaccination by frailty status (total vaccinated cohort)

## **Supplemental File S1 - Frailty assessment**

The frailty index (FI) was scored between 0 and 41 as detailed in Supplementary Table S1. The subject's pre-vaccination questionnaires contributed a max score of 29 and the medical history contributed a max score of 12. If a participant had more than 10 missing quality of life components, the FI was treated as missing, unless based on their available data their classification as frail was unquestionable (they already had sufficient deficits to be classified as frail).

The medical history was divided into 12 selected deficits (Supplementary Table S2). The coded combined medical history database from studies ZOE-50 and ZOE-70 were searched and participants with the relevant preferred terms were assigned to 1 or more of the deficits. If a subject had any of the listed events in a deficit category, they were assigned a max score of 1 for that deficit.

**Supplementary Table S1 - Details of components of frailty index**

| <b>Item</b>                   | <b>Scoring method based on response to questionnaire or medical history assessment</b>                                                                                                                                                                                                            | <b>Max Contribution to Frailty Index</b>                 |
|-------------------------------|---------------------------------------------------------------------------------------------------------------------------------------------------------------------------------------------------------------------------------------------------------------------------------------------------|----------------------------------------------------------|
| <i>SF-36 Q1</i>               | Poor=1<br>Fair=0.5<br>Good=0<br>Very good=0<br>Excellent=0                                                                                                                                                                                                                                        | 1                                                        |
| <i>SF-36 Q11A-11D</i>         | <b>Q11A, Q11C</b><br>Definitely true=1<br>Mostly true=0.5<br>Don't know=0<br>Mostly false=0<br>Definitely false=0<br><b>Q11B, Q11D</b><br>Definitely true=0<br>Mostly true=0<br>Don't know=0<br>Mostly false=0.5<br>Definitely false=1                                                            | 4                                                        |
| <i>SF-36 Q3A - Q3J</i>        | Limited a lot=1<br>Limited a little=0.5<br>Not limited at all=0                                                                                                                                                                                                                                   | 10                                                       |
| <i>SF-36 Q9A - Q9I</i>        | <b>Q9A, Q9D, Q9E, Q9H</b><br>All of the Time=0<br>Most of the time=0<br>Some of the time=0<br>A little of the time=0.5<br>None of the time=1<br><b>Q9B, Q9C, Q9F, Q9G, Q9I</b><br>All of the time=1<br>Most of the time=0.5<br>Some of the time=0<br>A little of the time=0<br>None of the time=0 | 9                                                        |
| <i>SF-36 Q2</i>               | Much worse=1<br>Somewhat worse=0.5<br>Same=0<br>Somewhat better=0<br>Better=0                                                                                                                                                                                                                     | 1                                                        |
| <i>EQ-5D Mobility</i>         | No Problems=0<br>Some Problems=0.5<br>Confined to bed=1                                                                                                                                                                                                                                           | 1                                                        |
| <i>EQ-5D Anxiety</i>          | No Anxiety=0<br>Moderate Anxiety=0.5<br>Extreme Anxiety=1                                                                                                                                                                                                                                         | 1                                                        |
| <i>EQ-5D Self care</i>        | No Problems=0<br>Some Problems=0.5<br>Inability to wash or dress himself /herself=1                                                                                                                                                                                                               | 1                                                        |
| <i>EQ-5D Usual activities</i> | No Problems=0<br>Some Problems=0.5<br>Inability to perform usual activities=1                                                                                                                                                                                                                     | 1                                                        |
| <b>Medical history</b>        | Cancer<br>Diabetes Mellitus<br>High Blood Pressure<br>Heart Attack<br>Congestive Heart Failure<br>Cerebrovascular Disease<br>Arthritis<br>Chronic Lung Disease<br>Stomach or Intestinal Ulcers<br>Migraine<br>Cataract<br>Glaucoma                                                                | 1<br>1<br>1<br>1<br>1<br>1<br>1<br>1<br>1<br>1<br>1<br>1 |
| <b>Total</b>                  |                                                                                                                                                                                                                                                                                                   | <b>41</b>                                                |

EQ-5D=EuroQol-5 Dimension; Q=question; SF-36=Short Form Survey-36

## Supplementary Table S2 - Detail of medical history search items

| <b>Deficit</b>                      | <b>MedDRA version 18 Search Terms</b>                                                                                                                                                                                                                                                                                                                                                                                                                                         |
|-------------------------------------|-------------------------------------------------------------------------------------------------------------------------------------------------------------------------------------------------------------------------------------------------------------------------------------------------------------------------------------------------------------------------------------------------------------------------------------------------------------------------------|
| <b>Cancer</b>                       | Malignancy related conditions (SMQ)<br>Malignant tumours (SMQ)                                                                                                                                                                                                                                                                                                                                                                                                                |
| <b>Diabetes Mellitus</b>            | Diabetes mellitus (incl subtypes) (HLT)<br>Diabetic complications (HLGT)                                                                                                                                                                                                                                                                                                                                                                                                      |
| <b>High Blood Pressure</b>          | Hypertension (SMQ)                                                                                                                                                                                                                                                                                                                                                                                                                                                            |
| <b>Heart Attack</b>                 | Ischaemic heart disease (SMQ)                                                                                                                                                                                                                                                                                                                                                                                                                                                 |
| <b>Congestive Heart Failure</b>     | Cardiac failure (SMQ)                                                                                                                                                                                                                                                                                                                                                                                                                                                         |
| <b>Cerebrovascular Disease</b>      | Central nervous system vascular disorders (SMQ)                                                                                                                                                                                                                                                                                                                                                                                                                               |
| <b>Arthritis</b>                    | Arthritis (SMQ)                                                                                                                                                                                                                                                                                                                                                                                                                                                               |
| <b>Chronic Lung Disease</b>         | Asthma/bronchospasm (SMQ)<br>Interstitial lung disease (SMQ)<br>Pulmonary hypertension (SMQ)<br>Chronic Obstructive Pulmonary Disease (PT) / Infective exacerbation of chronic obstructive airways disease (PT)<br>Bronchiectasis (PT) / Infective exacerbation of bronchiectasis (PT)<br>Cystic fibrosis (PT) / Cystic fibrosis lung (PT) / Infective pulmonary exacerbation of cystic fibrosis (PT)<br>Chronic respiratory disease (PT)<br>Chronic respiratory failure (PT) |
| <b>Stomach or Intestinal Ulcers</b> | Gastrointestinal ulceration (SMQ)                                                                                                                                                                                                                                                                                                                                                                                                                                             |
| <b>Migraine</b>                     | Migraine headaches (HLT)<br>Migraine prophylaxis (PT)                                                                                                                                                                                                                                                                                                                                                                                                                         |
| <b>Cataract</b>                     | Cataract Conditions (HLT)<br>Cataract operation (PT)<br>Cataract diabetic (PT)<br>Cataract operation complication (PT)                                                                                                                                                                                                                                                                                                                                                        |
| <b>Glaucoma</b>                     | Glaucoma (SMQ)                                                                                                                                                                                                                                                                                                                                                                                                                                                                |

HLGT=high level group term; HLT=high level term; PT=preferred term; SMQ=Standardized MedDRA queries

**Supplementary Table S3 - Vaccine efficacy estimates (modified total vaccinated cohort)**

| Herpes zoster     | RZV group |    |          |                | Placebo group |     |          |                | Vaccine Efficacy    |
|-------------------|-----------|----|----------|----------------|---------------|-----|----------|----------------|---------------------|
|                   | N         | n  | T (year) | n/T (per 1000) | N             | n   | T(year)  | n/T (per 1000) | % (95% CI)          |
| Non-Frail         | 5545      | 8  | 21803    | 0.4            | 5551          | 188 | 21443    | 8.8            | 95.8 (91.6, 98.2)   |
| Pre-Frail         | 5738      | 18 | 21842    | 0.8            | 5969          | 191 | 22250    | 8.6            | 90.4 (84.4, 94.4)   |
| Frail             | 1449      | 5  | 5158     | 1.0            | 1348          | 46  | 4663     | 9.9            | 90.2 (75.4, 97.0)   |
| Unknown           | 53        | 0  | 186      | 0.0            | 62            | 5   | 194      | 25.8           | 100.0 (14.6, 100.0) |
| Burden of Illness | RZV group |    |          |                | Placebo group |     |          |                | Vaccine Efficacy    |
|                   | N         | n  | T (year) | ZBPI BOI       | N             | n   | T (year) | ZBPI BOI       | % (95% CI)          |
| Non-Frail         | 5545      | 8  | 21803    | 0.017          | 5550          | 187 | 21439    | 1.173          | 98.6 (97.1, 100.0)  |
| Pre-Frail         | 5738      | 18 | 21842    | 0.108          | 5968          | 190 | 22248    | 1.475          | 92.6 (86.6, 98.7)   |
| Frail             | 1449      | 5  | 5158     | 0.345          | 1348          | 46  | 4663     | 2.330          | 85.2 (62.6, 100.0)  |
| Unknown           | 53        | 0  | 186      | 0.000          | 60            | 3   | 190      | 3.303          | 100.0 (NE)          |

N=number of participants with follow-up; n=number of participants with a confirmed zoster episode; RZV=adjuvanted recombinant zoster vaccine; T (year)=total years of follow-up for all participants in that subgroup; 95% CI=95% confidence interval using the variance estimate of the vaccine efficacy from the Chang test; ZBPI=Zoster Brief Pain Inventory; BOI=burden of illness; NE=not estimable

“Unknown” refers to participants who could not be assigned a frailty subgroup due to missing data

ZBPI Burden of Illness score was calculated as the sum of the ZBPI worst pain scores for all participants in the group divided by participant years of follow-up. Participants who did not have a confirmed zoster episode were assigned a score of 0. Four participants in the placebo group who had a confirmed zoster episode but who did not have at least one ZBPI assessment were excluded from the analysis of ZBPI BOI efficacy

**Supplementary Table S4 - Number of participants in the various cohorts (total vaccinated cohort)**

|                                                  | <b>RZV<br/>N=13487<br/>n</b> | <b>Placebo<br/>N=13489<br/>n</b> | <b>Total<br/>N=26976<br/>n</b> |
|--------------------------------------------------|------------------------------|----------------------------------|--------------------------------|
| Total vaccinated cohort                          | 13487                        | 13489                            | 26976                          |
| Modified total vaccinated cohort                 | 12785                        | 12930                            | 25715                          |
| Total vaccinated cohort - diary card subset      | 4570                         | 4571                             | 9141                           |
| ATP cohort for immunogenicity - humoral month 3  | 1400                         | 1432                             | 2832                           |
| ATP cohort for immunogenicity - humoral month 14 | 1360                         | 1366                             | 2726                           |
| ATP cohort for immunogenicity - humoral month 26 | 1318                         | 1314                             | 2632                           |
| ATP cohort for immunogenicity - humoral month 38 | 1255                         | 1253                             | 2508                           |
| ATP cohort for immunogenicity - CMI month 3      | 196                          | 204                              | 400                            |
| ATP cohort for immunogenicity - CMI month 14     | 187                          | 194                              | 381                            |
| ATP cohort for immunogenicity - CMI month 26     | 185                          | 188                              | 373                            |
| ATP cohort for immunogenicity - CMI month 38     | 174                          | 180                              | 354                            |

ATP=according-to-protocol; CMI=cell-mediated immunogenicity; N=total number of participants; n=number of participants in the given cohort=RZV, adjuvanted recombinant zoster vaccine

**Supplementary Table S5 - Summary of demographic characteristics**

|                            |                                          | <b>RZV<br/>N=13487</b> | <b>Placebo<br/>N=13489</b> | <b>Total<br/>N=26976</b> |
|----------------------------|------------------------------------------|------------------------|----------------------------|--------------------------|
| <b>Age (years)</b>         | Mean                                     | 68.8                   | 68.8                       | 68.8                     |
|                            | Median                                   | 71.0                   | 71.0                       | 71.0                     |
|                            | Minimum                                  | 50                     | 48                         | 48                       |
|                            | Maximum                                  | 96                     | 95                         | 96                       |
| <b>Gender</b>              | Female                                   | 58.0 %                 | 58.3 %                     | 58.1 %                   |
|                            | Male                                     | 42.0 %                 | 41.7 %                     | 41.9 %                   |
| <b>Ethnicity</b>           | American hispanic or latino              | 8.8 %                  | 8.8 %                      | 8.8 %                    |
|                            | Not american hispanic or latino          | 91.2 %                 | 91.2 %                     | 91.2 %                   |
| <b>Geographic Ancestry</b> | White - Caucasian / European<br>Heritage | 74.6 %                 | 74.5 %                     | 74.6 %                   |
|                            | Asian - East Asian Heritage              | 15.2 %                 | 15.1 %                     | 15.2 %                   |
|                            | Other                                    | 4.7 %                  | 4.8 %                      | 4.8 %                    |

N=total number of participants; RZV=adjuvanted recombinant zoster vaccine

**Supplementary Table S6 - Incidence and nature of symptoms (solicited only) reported during the 7-day (days 0–6) post-vaccination period overall per participant by frailty status (total vaccinated cohort - diary card subset)**

|                  | Sub-group        | Group   | Any symptom |      |      |        |      | General symptoms |      |      |        |      | Local symptoms |      |      |        |      |
|------------------|------------------|---------|-------------|------|------|--------|------|------------------|------|------|--------|------|----------------|------|------|--------|------|
|                  |                  |         | N           | n    | %    | 95% CI |      | N                | n    | %    | 95% CI |      | N              | n    | %    | 95% CI |      |
|                  |                  |         |             |      |      | LL     | UL   |                  |      |      | LL     | UL   |                |      |      | LL     | UL   |
| <b>Any Grade</b> | <b>Non-Frail</b> | RZV     | 2008        | 1752 | 87.3 | 85.7   | 88.7 | 2007             | 1369 | 68.2 | 66.1   | 70.2 | 2007           | 1699 | 84.7 | 83.0   | 86.2 |
|                  |                  | Placebo | 2034        | 654  | 32.2 | 30.1   | 34.2 | 2034             | 558  | 27.4 | 25.5   | 29.4 | 2034           | 227  | 11.2 | 9.8    | 12.6 |
|                  | <b>Pre-Frail</b> | RZV     | 1977        | 1649 | 83.4 | 81.7   | 85.0 | 1971             | 1242 | 63.0 | 60.8   | 65.1 | 1977           | 1559 | 78.9 | 77.0   | 80.6 |
|                  |                  | Placebo | 1964        | 662  | 33.7 | 31.6   | 35.8 | 1964             | 575  | 29.3 | 27.3   | 31.3 | 1964           | 227  | 11.6 | 10.2   | 13.1 |
|                  | <b>Frail</b>     | RZV     | 490         | 360  | 73.5 | 69.3   | 77.3 | 488              | 248  | 50.8 | 46.3   | 55.3 | 489            | 335  | 68.5 | 64.2   | 72.6 |
|                  |                  | Placebo | 468         | 169  | 36.1 | 31.8   | 40.6 | 468              | 154  | 32.9 | 28.7   | 37.4 | 468            | 51   | 10.9 | 8.2    | 14.1 |
|                  | <b>Unknown</b>   | RZV     | 21          | 18   | 85.7 | 63.7   | 97.0 | 21               | 11   | 52.4 | 29.8   | 74.3 | 21             | 17   | 81.0 | 58.1   | 94.6 |
|                  |                  | Placebo | 18          | 7    | 38.9 | 17.3   | 64.3 | 18               | 6    | 33.3 | 13.3   | 59.0 | 17             | 2    | 11.8 | 1.5    | 36.4 |
| <b>Grade 3</b>   | <b>Non-Frail</b> | RZV     | 2008        | 349  | 17.4 | 15.7   | 19.1 | 2007             | 240  | 12.0 | 10.6   | 13.5 | 2007           | 190  | 9.5  | 8.2    | 10.8 |
|                  |                  | Placebo | 2034        | 37   | 1.8  | 1.3    | 2.5  | 2034             | 36   | 1.8  | 1.2    | 2.4  | 2034           | 4    | 0.2  | 0.1    | 0.5  |
|                  | <b>Pre-Frail</b> | RZV     | 1977        | 279  | 14.1 | 12.6   | 15.7 | 1971             | 185  | 9.4  | 8.1    | 10.8 | 1977           | 172  | 8.7  | 7.5    | 10.0 |
|                  |                  | Placebo | 1964        | 44   | 2.2  | 1.6    | 3.0  | 1964             | 40   | 2.0  | 1.5    | 2.8  | 1964           | 6    | 0.3  | 0.1    | 0.7  |
|                  | <b>Frail</b>     | RZV     | 490         | 75   | 15.3 | 12.2   | 18.8 | 488              | 50   | 10.2 | 7.7    | 13.3 | 489            | 50   | 10.2 | 7.7    | 13.3 |
|                  |                  | Placebo | 468         | 24   | 5.1  | 3.3    | 7.5  | 468              | 22   | 4.7  | 3.0    | 7.0  | 468            | 5    | 1.1  | 0.3    | 2.5  |
|                  | <b>Unknown</b>   | RZV     | 21          | 1    | 4.8  | 0.1    | 23.8 | 21               | 0    | 0.0  | 0.0    | 16.1 | 21             | 1    | 4.8  | 0.1    | 23.8 |
|                  |                  | Placebo | 18          | 0    | 0.0  | 0.0    | 18.5 | 18               | 0    | 0.0  | 0.0    | 18.5 | 17             | 0    | 0.0  | 0.0    | 19.5 |

CI=confidence interval; LL=lower limit; N=number of participants in each group; n (%)=number (percentage) of participants reporting the adverse event at least once; RZV=adjuvanted recombinant zoster vaccine; UL=upper limit



**Supplementary Figure S1 - Percentages of participants reporting any unsolicited adverse events within the 30-day (days 0-29) post-vaccination by frailty status (total vaccinated cohort)**

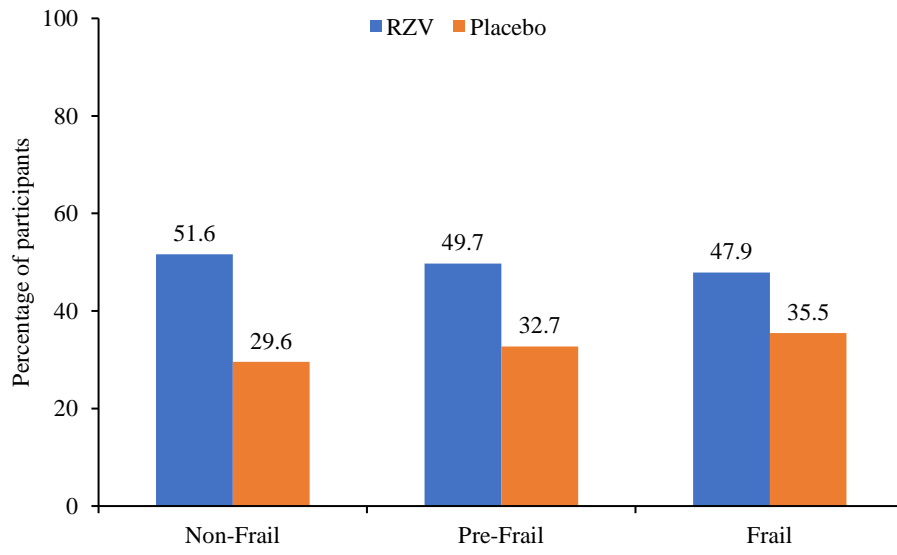

RZV= adjuvanted recombinant zoster vaccine
